# Supplementary material
Source: publisher figshare collection journal article supplement (https://frontiersin.figshare.com/ndownloader/files/35074651)
Supplement: Supplementary file 2 [file 35074651]

## **Supplementary Information**

### **Supplementary Tables 1-8**

**Combined drought and heat stress influences the root water relation and determine the dry root rot disease development under field conditions: a study using contrasting chickpea genotypes**

#### **Authors:**

Aswin Reddy Chilakala<sup>1#</sup>, Komal Vitthalrao Mali<sup>1#</sup>, Vadivelmurugan Irulappan<sup>1</sup>, Basavanagouda S. Patil<sup>2</sup>, Prachi Pandey<sup>1</sup>, Krishnappa Rangappa<sup>3</sup>, Venkategowda Ramegowda<sup>4</sup>, M. Nagaraj Kumar<sup>5</sup>, Puli Chandra Obul Reddy<sup>6</sup>, Basavaiah Mohan-Raju<sup>4</sup> and Muthappa Senthil-Kumar<sup>1\*</sup>

#### **\*Correspondence:**

Muthappa Senthil-Kumar, National Institute of Plant Genome Research, Aruna Asaf Ali Marg, P.O. Box No. 10531, New Delhi 110067, India. Email: [skmuthappa@nipgr.ac.in](mailto:skmuthappa@nipgr.ac.in).

**Supplementary Table S1: Passport data, and DUS (distinctness, uniformity, and stability) characteristics of genotypes ICC 4958 and JG 62.**

| <b>S No.</b> | <b>Traits and other information</b>       | <b>ICC 4958</b>                                                                    | <b>JG 62</b>                               |
|--------------|-------------------------------------------|------------------------------------------------------------------------------------|--------------------------------------------|
| <b>1</b>     | <b>Plant height (cm)</b>                  | 40.6 ± 4.3                                                                         | 36.9 ± 4.2                                 |
| <b>2</b>     | <b>Plant spread (cm)</b>                  | 24.4 ± 5.2                                                                         | 18.7 ± 7.3                                 |
| <b>3</b>     | <b>Number of branches per plant</b>       | 11.5 ± 2.8                                                                         | 8.3 ± 4.4                                  |
| <b>4</b>     | <b>Number of pods per plant</b>           | 34.0 ± 8.7                                                                         | 23.4 ± 5.6                                 |
| <b>5</b>     | <b>Yield per plant (g)</b>                | 10.8 ± 4.5                                                                         | 5.6 ± 2.8                                  |
| <b>6</b>     | <b>100 seed weight (g)</b>                | 34.4 ± 2.4                                                                         | 14.7 ± 0.8                                 |
| <b>7</b>     | <b>Days per maturity</b>                  | 117.0 ± 3.7                                                                        | 103.0 ± 4.5                                |
| <b>8</b>     | <b>Pedigree status</b>                    | Parent                                                                             | Parent                                     |
| <b>9</b>     | <b>Stress tolerance/sensitivity</b>       | Drought tolerant                                                                   | DRR susceptible, salinity sensitive        |
| <b>10</b>    | <b>Genome sequence status</b>             | Sequenced (SRX9466450)                                                             | Sequenced (SRX9956275)                     |
| <b>11</b>    | <b>Recommended region for cultivation</b> | It is best suited to areas having moderate rainfall of 60-90 centimeters per annum | It is best for short drier growing seasons |

Reference- [http://oar.icrisat.org/540/1/PMD\\_33.pdf](http://oar.icrisat.org/540/1/PMD_33.pdf)

**Supplementary Table S2: Information on the soil and climatic conditions about different experimental locations across the country where field trials were conducted.**

| <b>S. No</b> | <b>Locations of trials</b> | <b>State</b>   | <b>Location</b> | <b>Lat/Long</b> | <b>Average Temp*</b> | <b>Average Rainfall*</b> | <b>Soil Type</b>                  |
|--------------|----------------------------|----------------|-----------------|-----------------|----------------------|--------------------------|-----------------------------------|
| <b>1</b>     | <b>Location 1</b>          | New Delhi      | NIPGR           | 28.61/77.20     | 25.2 °C              | 693 mm                   | Clay                              |
| <b>2</b>     | <b>Location 2</b>          | Uttar Pradesh  | Meerut          | 15.45/75.00     | 24.3 °C              | 885 mm                   | Black                             |
| <b>3</b>     | <b>Location 3</b>          | Karnataka      | Dharwad         | 12.97/77.59     | 23.6 °C              | 831 mm                   | Red loamy soil/Laterite soil      |
| <b>4</b>     | <b>Location 4</b>          | Karnataka      | Bangalore       | 28.98/77.70     | 24.7 °C              | 933 mm                   | Sandy Loam/Loam                   |
| <b>5</b>     | <b>Location 5</b>          | Meghalaya      | Shillong        | 25°41/92°09     | 17.1 °C              | 3385 mm                  | Sandy to claye loam Alluvial soil |
| <b>6</b>     | <b>Location 6</b>          | Andhra Pradesh | Kadapa          | 14.54/78.59     | 29.2 °C              | 753 mm                   | Black                             |
| <b>7</b>     | <b>Farmer field 1</b>      | Chhattisgarh   | Raipur          | 21.25/81.62     | 26.8 °C              | 1276 mm                  | Red/black Ferralitic soil         |
| <b>8</b>     | <b>Farmer field 2</b>      | Karnataka      | Raichur         | 16.2/77.35      | 28 °C                | 713mm                    | Sandy loam to Sandy clay Black    |

**Supplementary Table S3: Details of the field trial experiments conducted at six locations.**

| <b>Trail locations</b>        | <b>Date of Sowing (dd/mm/yyyy)</b> | <b>Other pest/ diseases observed</b> | <b>Soil Moisture measurement method adopted.</b> | <b>Date of harvest (dd/mm/yyyy)</b>          |
|-------------------------------|------------------------------------|--------------------------------------|--------------------------------------------------|----------------------------------------------|
| <b>Location 1 (New Delhi)</b> | <b>17.10.2020</b>                  | <b>Insignificant</b>                 | <b>Lutron soil moisture probe</b>                | <b>10.03.2021</b>                            |
| <b>Location 2 (Meerut)</b>    | <b>22.11.2020</b>                  | <b>Insignificant</b>                 | <b>Regulated irrigation</b>                      | <b>5.04.2021</b>                             |
| <b>Location 3 (Dharwad)</b>   | <b>19.12.2020</b>                  | <b>Insignificant</b>                 | <b>Regulated irrigation</b>                      | <b>30.03.2021</b>                            |
| <b>Location 4 (Bangalore)</b> | <b>19.12.2020</b>                  | <b>Insignificant</b>                 | <b>Soil moisture probe</b>                       | <b>01.04.2021</b>                            |
| <b>Location 5 (Shillong)</b>  | <b>12.11.2020</b>                  | <b>Insignificant</b>                 | <b>Regulated irrigation</b>                      | <b>24.02.2021</b>                            |
| <b>Location 6 (Kadapa)</b>    | <b>30.12.2020</b>                  | <b>Insignificant</b>                 | <b>Regulated irrigation</b>                      | <b>Crop loss due to heavy rains @ 40 DAS</b> |

**Supplementary Table S4: Details of various experiments and the parameters measured in the study**

| Sl.no | Key Experiments                                              | Replications                                                                    | Treatments                | Details of treatments             |                                                 |                   | Parameters measured                                                                                                       | Key findings                                                                                                                                                                                       |
|-------|--------------------------------------------------------------|---------------------------------------------------------------------------------|---------------------------|-----------------------------------|-------------------------------------------------|-------------------|---------------------------------------------------------------------------------------------------------------------------|----------------------------------------------------------------------------------------------------------------------------------------------------------------------------------------------------|
|       |                                                              |                                                                                 |                           | Irrigation                        | Fungicide                                       | Temperature       |                                                                                                                           |                                                                                                                                                                                                    |
| 1.    | <b>Experiment 1:</b><br>On season multilocation field trials | 1. Six locations.<br>2. A minimum of 2/3 blocks per treatment in each location. | Mild pathogen             | Frequent irrigation (80% FC)      | Yes                                             | Ambient           | Root relative water content (A minimum of 4 biological samples in each block per treatment), DI                           | -ICC 4958 was found to be significantly tolerant to DRR disease.<br>-Root relative water was found to affect the disease incidence negatively.                                                     |
|       |                                                              |                                                                                 | Mild pathogen + drought   | Less frequent irrigation (50% FC) | Yes                                             | Ambient           |                                                                                                                           |                                                                                                                                                                                                    |
|       |                                                              |                                                                                 | Severe pathogen           | Frequent irrigation (80% FC)      | No                                              | Ambient           |                                                                                                                           |                                                                                                                                                                                                    |
|       |                                                              |                                                                                 | Severe pathogen + drought | Less frequent irrigation (50% FC) | No                                              | Ambient           |                                                                                                                           |                                                                                                                                                                                                    |
| 2.    | <b>Experiment 2:</b><br>Off-season field trial               | 1. Single location.<br>2. Four blocks per treatment.                            | Mild pathogen             | Frequent irrigation (80% FC)      | Yes                                             | High              | Root relative water content (a minimum of 4 biological replications in each block per treatment), DI                      | -DRR Disease increased under combined heat and drought stresses.<br>- ICC 4958 was found to be susceptible to DRR under heat stress. i.e., Breakdown of resistance due to high-temperature stress. |
|       |                                                              |                                                                                 | Mild pathogen +drought    | Less frequent irrigation (50% FC) | Yes                                             | High              |                                                                                                                           |                                                                                                                                                                                                    |
|       |                                                              |                                                                                 | Severe pathogen           | Frequent irrigation (80% FC)      | No                                              | High              |                                                                                                                           |                                                                                                                                                                                                    |
|       |                                                              |                                                                                 | Severe pathogen + drought | Less frequent irrigation (50% FC) | No                                              | High              |                                                                                                                           |                                                                                                                                                                                                    |
| 3.    | <b>Experiment 3:</b><br>Controlled conditions/ sick pot      | 1. Ten pots with 5 plants each.<br>2. The experiment was repeated thrice.       | Control                   | 90% FC                            | Autoclaved soil rite, No fungicide              | Ambient (22/10°C) | Root water potential, leaf water potential (Three biological samples per treatment were used each time), Disease severity | -Heat disrupts the resistance of ICC 4958 to DRR<br>-Negative correlation between leaf water potential and DI                                                                                      |
|       |                                                              |                                                                                 | Drought                   | 40-60% FC                         | Autoclaved soil rite, No fungicide treatment    | Ambient (22/10°C) |                                                                                                                           |                                                                                                                                                                                                    |
|       |                                                              |                                                                                 | Pathogen only             | 90% FC                            | Artificial inoculation of M. phaseolina in soil | Ambient (22/10°C) |                                                                                                                           |                                                                                                                                                                                                    |
|       |                                                              |                                                                                 | Combined stress           | 40-60% FC                         | Artificial inoculation of M.                    | Ambient (22/10°C) |                                                                                                                           |                                                                                                                                                                                                    |

|    |                                                                                               |                               |                                 |                                            |                                                             |                   |                                                                                                                                                    |                                                                                                                                       |
|----|-----------------------------------------------------------------------------------------------|-------------------------------|---------------------------------|--------------------------------------------|-------------------------------------------------------------|-------------------|----------------------------------------------------------------------------------------------------------------------------------------------------|---------------------------------------------------------------------------------------------------------------------------------------|
|    |                                                                                               |                               |                                 |                                            | phaseolina<br>in soil                                       |                   |                                                                                                                                                    |                                                                                                                                       |
|    |                                                                                               |                               | Heat                            | 90% FC                                     | Autoclaved<br>soil rite, No<br>fungicide<br>treatment       | 37/25°C, 5<br>DAS |                                                                                                                                                    |                                                                                                                                       |
|    |                                                                                               |                               | Heat +<br>Drought               | 40-60%<br>FC                               | Autoclaved<br>soil rite, No<br>fungicide<br>treatment       | 37/25°C, 5<br>DAS |                                                                                                                                                    |                                                                                                                                       |
|    |                                                                                               |                               | Heat<br>+Pathogen               | 90% FC                                     | Artificial<br>inoculation<br>of M.<br>phaseolina<br>in soil | 37/25°C, 5<br>DAS |                                                                                                                                                    |                                                                                                                                       |
|    |                                                                                               |                               | Heat+<br>Drought+<br>Pathogen   | 40-60%<br>FC                               | Artificial<br>inoculation<br>of M.<br>phaseolina<br>in soil | 37/25°C, 5<br>DAS |                                                                                                                                                    |                                                                                                                                       |
| 4. | <b>Experiment<br/>4:</b><br>Controlled<br>conditions<br>pot<br>experiments<br>with field soil | Three<br>replications.        | Mild<br>pathogen                | Frequent<br>irrigation<br>(80% FC)         | Yes                                                         | Ambient           | Root system<br>architecture<br>traits like root<br>length, root<br>area, root<br>volume, etc.<br>(Three<br>biological<br>samples per<br>treatment) | Root traits<br>varied<br>between the<br>two genotypes<br>across<br>different<br>treatments.                                           |
|    |                                                                                               |                               | Mild<br>pathogen +<br>drought   | Less<br>frequent<br>irrigation<br>(50% FC) | Yes                                                         | Ambient           |                                                                                                                                                    |                                                                                                                                       |
|    |                                                                                               |                               | Severe<br>pathogen              | Frequent<br>irrigation<br>(80% FC)         | No                                                          | Ambient           |                                                                                                                                                    |                                                                                                                                       |
|    |                                                                                               |                               | Severe<br>pathogen +<br>drought | Less<br>frequent<br>irrigation<br>(50% FC) | No                                                          | Ambient           |                                                                                                                                                    |                                                                                                                                       |
| 5. | <b>Experiment<br/>5:</b><br>Paper Blot                                                        | Four<br>biological<br>samples | Control                         | NA                                         | No infection                                                | Ambient           | Micro-<br>sclerotia<br>attachment<br>using SEM                                                                                                     | ICC 4958 was<br>found to have<br>a significantly<br>lower percent<br>of<br>microsclerotia<br>attached in<br>comparison<br>with JG 62. |
|    |                                                                                               |                               | Pathogen<br>infection           |                                            | Seedings<br>infected<br>with<br>microsclero<br>tia          | Ambient           |                                                                                                                                                    |                                                                                                                                       |

**Supplementary Table S5: Details of the soil characteristics and nutrient content for the six experimental locations.** Soil sampling was done at rhizosphere of chickpea (30-50 cm) from six different sites across each trail location. The data represented here is a mean of five replicates of soil sample test report.

| Parameters  | Location 1        | Location 2      | Location 3 | Location 4       | Location 5       | Location 6       |
|-------------|-------------------|-----------------|------------|------------------|------------------|------------------|
| <b>pH</b>   | 7.18±0.32         | 7.09±0.27       | 5.77±0.34  | 7.11±0.22        | 4.71±0.04        | 6.88±0.27        |
| <b>EC</b>   | 1.41±0.72         | 0.2±0.03        | 0.18±0.05  | 0.34±0.09        | 0.28±0.14        | 0.29±0.09        |
| <b>OC</b>   | 0.51±0.38         | 0.62±0.08       | 0.71±0.11  | 0.29±0.01        | 1.36±0.67        | 0.52±0.04        |
| <b>P</b>    | 88.2±65.72        | 36.83±0.58      | 21.07±5.62 | 20.15±9.93       | 9.02±4.8         | 57.03±4.24       |
| <b>K</b>    | 774.33±56<br>4.27 | 234.67±6.5<br>1 | 230±15.39  | 133.67±4.5<br>1  | 212.33±23.<br>97 | 394.67±32.<br>15 |
| <b>N</b>    | 125.3±75.2<br>2   | 149±106.0<br>2  | 188±0      | 118.33±12.<br>42 | 377±21           | 279±32.08        |
| <b>S</b>    | 133.67±32.<br>02  | 5.01±3.72       | 8.7±1.78   | 12.9±1.23        | 1.28±0.23        | 7.69±3.67        |
| <b>B</b>    | 0.53±0.26         | 0.72±0.05       | 0.55±0.31  | 0.19±0.02        | 0.43±0.08        | 0.32±0.05        |
| <b>WHC</b>  | 37.87±2.32        | 45.6±1.56       | 30.13±1    | 30.87±1.59       | 50.97±7.57       | 41.97±8.4        |
| <b>Sand</b> | 40.8±2            | 36.13±4.16      | 52.8±2     | 61.47±11.7<br>2  | 26.2±5.52        | 54.8±2           |
| <b>Silt</b> | 40.93±1.01        | 15.33±1.15      | 9.33±1.15  | 17.6±9.52        | 45.93±2.25       | 12.67±2.31       |
| <b>Clay</b> | 15.6±4.61         | 48.53±4.62      | 37.87±1.15 | 20.93±4.39       | 27.87±4.16       | 32.53±1.15       |

**Supplementary Table S6: Correlation table showing the relationship between different edaphic factors and disease incidence.** The correlation analysis was performed using the disease incidence observed in pathogen treatments of locations 1, 2, and 3 with the soil characteristics in that region.

| Correlations       |              |              |               |               |        |        |        |               |        |        |        |        |      |
|--------------------|--------------|--------------|---------------|---------------|--------|--------|--------|---------------|--------|--------|--------|--------|------|
|                    | PDI          | pH           | EC            | C (organic)   | P      | K      | N      | S             | B      | WHC    | Sand   | Silt   | Clay |
| <b>DI</b>          | 1            |              |               |               |        |        |        |               |        |        |        |        |      |
| <b>pH</b>          | -0.538       | 1            |               |               |        |        |        |               |        |        |        |        |      |
| <b>EC</b>          | -0.502       | <b>.999*</b> | 1             |               |        |        |        |               |        |        |        |        |      |
| <b>C (organic)</b> | 0.821        | 0.039        | 0.082         | 1             |        |        |        |               |        |        |        |        |      |
| <b>P</b>           | -0.186       | 0.928        | 0.943         | 0.408         | 1      |        |        |               |        |        |        |        |      |
| <b>K</b>           | -0.274       | 0.958        | 0.969         | 0.324         | 0.996  | 1      |        |               |        |        |        |        |      |
| <b>N</b>           | 0.993        | -0.434       | -0.395        | 0.883         | -0.068 | -0.157 | 1      |               |        |        |        |        |      |
| <b>S</b>           | -0.461       | 0.996        | <b>.999*</b>  | 0.128         | 0.958  | 0.980  | -0.352 | 1             |        |        |        |        |      |
| <b>B</b>           | 0.830        | 0.023        | 0.066         | <b>1.000*</b> | 0.393  | 0.309  | 0.891  | 0.112         | 1      |        |        |        |      |
| <b>WHC</b>         | 0.923        | -0.171       | -0.129        | 0.978         | 0.207  | 0.118  | 0.962  | -0.083        | 0.981  | 1      |        |        |      |
| <b>Sand</b>        | -0.715       | -0.205       | -0.246        | -0.986        | -0.554 | -0.477 | -0.793 | -0.291        | -0.983 | -0.929 | 1      |        |      |
| <b>Silt</b>        | -0.484       | <b>.998*</b> | <b>1.000*</b> | 0.102         | 0.950  | 0.974  | -0.376 | <b>1.000*</b> | 0.086  | -0.109 | -0.266 | 1      |      |
| <b>Clay</b>        | <b>0.969</b> | -0.730       | -0.700        | 0.654         | -0.424 | -0.504 | 0.932  | -0.667        | 0.666  | 0.798  | -0.519 | -0.685 | 1    |

\*. Correlation is significant at the 0.05 level (2-tailed).



**Supplementary Table S7: The list of pathogen collections showing different *Macrophomina phaseolina* strains across the country.**

| S No | Lab ID number | Name of the Location (Village, State name) with the Geographical coordinates | NCBI ID    | Date of collection |
|------|---------------|------------------------------------------------------------------------------|------------|--------------------|
| 0    | SKMPt36       | 28.5308265,77.1645855<br>NIPGR, New Delhi, Delhi                             | MH509971.1 | 06.10.2017         |
| 1    | SKMPt65       | 15.4847352,74.9752876<br>IARI RRS, Dharwad, Karnataka                        | OM674331   | 14.04.2020         |
| 2    | SKMPt46       | 29.1417261,77.6825693<br>SVPUAT, Meerut, Uttar Pradesh                       | OM674332   | 16.06.2020         |
| 3    | SKMPt67       | 16.2420450, 80.4479080<br>Vatticherukuru Rd, Guntur, Andhra Pradesh          | OM674333   | 29.07.2021         |
| 4    | SKMPt68       | 13.085556, 77.572167<br>GKVK, Bangalore, Karnataka                           | OM674334   | 29.07.2021         |
| 5    | SKMPt69       | 20.7034744, 77.0246871<br>Akola, Maharashtra                                 | OM674335   | 29.07.2021         |
| 6    | SKMPt70       | 16.3886680, 80.4283270<br>Lam, Guntur, Andhra Pradesh                        | OM674336   | 29.07.2021         |
| 7    | SKMPt71       | 14.3345154,75.6039816<br>Kamalapur, Dharwad, Karnataka                       | OM674337   | 29.07.2021         |
| 8    | SKMPt72       | 21.235016, 81.7041701<br>IGKV, Raipur, Chhattisgarh                          | OM674338   | 20.04.2020         |
| 9    | SKMPt73       | 15.986696, 80.381671<br>Cherukuru, Bapatla, Andhra Pradesh                   | OM674339   | 29.07.2021         |
| 10   | SKMPt74       | 16.4149850, 80.4419570<br>Tadikonda, Guntur, Andhra Pradesh                  | OM674340   | 29.07.2021         |
| 11   | SKMPt75       | 16.7323334,76.7989625<br>Bhimarayanagudi, Yadgir, Karnataka                  | OM674341   | 29.07.2021         |
| 12   | SKMPt50       | 14.537813 78.560633<br>Vempalli, Kadappa, Andhra Pradesh.                    | OM674342   | 16.06.2020         |
| 13   | SKMPt53       | 15.12121 77.353083<br>Guntakal, Anantapur, Andhra Pradesh.                   | OM674343   | 16.06.2020         |

**Supplementary Table S8. Crops rotated with chickpea and weeds infesting chickpea fields**

| S. No. | Field Co-ordinates                  | City         | DRR observed in chickpea | Species of weeds observed                                                                | Crops cultivated before chickpea                 | Crops after chickpea |
|--------|-------------------------------------|--------------|--------------------------|------------------------------------------------------------------------------------------|--------------------------------------------------|----------------------|
| 1      | 12.9716° N, 77.5946° E              | Bangalore    | Yes                      | <i>Euphorbia hirta</i> ,<br><i>Cyperus rotundus</i>                                      | NA                                               | NA                   |
| 2      | 28.9845° N, 77.7064° E              | Meerut       | Yes                      | <i>Parthenium hysterophorus</i> ,<br><i>Cyperus rotundus</i> ,<br><i>Medicago sativa</i> | NA                                               | NA                   |
| 3      | 25°34' 43.583" N 91°53' 5.714E      | Shillong     | Yes                      | <i>Eupatorium</i> sp.                                                                    | <i>Zea mays</i>                                  | NA                   |
| 4      | 15.4589° N, 75.0078° E              | Dharwad      | Yes                      | <i>Tridax procumbens</i> ,<br><i>Amaranthus viridis</i>                                  | <i>Arachis hypogea</i> ,<br><i>Vigna radiata</i> | NA                   |
| 5      | 16°12' 43.211" N, 77° 20'38.142" E. | Raichur      | Yes                      | <i>Amaranthus viridis</i> ,<br><i>Euphorbia hirta</i> ,                                  | NA                                               | NA                   |
| 6      | 21°15'4.98"N, 81°37'46.71"E         | Raipur       | Yes                      | <i>Amaranthus viridis</i> ,<br><i>Parthenium hysterophorus</i>                           | NA                                               | NA                   |
| 7      | 28.6139° N, 77.2090° E              | New Delhi    | Yes                      | <i>Medicago sativa</i> ,<br><i>Coriandrum sativum</i> , <i>Spinacea oleracea</i>         | NA                                               | NA                   |
| 8      | 16.3067° N, 80.4365° E              | Guntur       | Yes                      | <i>Arachis hypogea</i> ,<br><i>Cyperus rotundus</i> ,<br><i>Tridax procumbens</i>        | <i>Sorghum bicolor</i> (mixed crop)              | NA                   |
| 9      | 14.5171° N, 78.3679° E              | Ganganapalle | Yes                      | <i>Euphorbia hirta</i> ,<br><i>Mentha</i> spp,<br><i>Arachis hypogea</i>                 | NA                                               | NA                   |
